# Supplementary material for: Paper/GO/e-Au flexible SERS sensors for in situ detection of tricyclazole in orange juice and on cucumber skin at the sub-ppb level: machine learning-assisted data analysis
Source: Royal Society of Chemistry journal article supplement (doi:10.1039/d3na01113e), 2024-01-01
Supplement: d3na01113e1.pdf [file d3na01113e1.pdf]

Supporting information for

**Paper/GO/e-Au Flexible SERS Sensors for In-situ Detection of  
Tricyclazole in Orange Juice and on Cucumber Skin at Sub-ppb  
Level: Machine Learning-Assisted Data Analysis**

Ha Anh Nguyen<sup>a,\*</sup>,<sup>1</sup>, Quan Doan Mai<sup>a,1</sup>, Dao Thi Nguyet Nga<sup>a</sup>, Minh Khanh Pham<sup>a</sup>,

Quoc Khanh Nguyen<sup>b</sup>, Trong Hiep Do<sup>b</sup>, Van Thien Luong<sup>b</sup>,

Vu Dinh Lam<sup>c</sup>, Anh-Tuan Le<sup>a,d,\*\*</sup>

<sup>a</sup>*Phenikaa University Nano Institute (PHENA), Phenikaa University, Hanoi 12116, Vietnam*

<sup>b</sup>*Faculty of Computer Science, Phenikaa University, Hanoi 12116, Vietnam*

<sup>c</sup>*Institute of Materials Science (IMS) and Graduate University of Science and Technology  
(GUST), Vietnam Academy of Science and Technology, 18 Hoang Quoc Viet, Hanoi 10000,  
Vietnam*

<sup>d</sup>*Faculty of Materials Science and Engineering (MSE), Phenikaa University, Hanoi 12116,  
Vietnam*

Corresponding authors:

[\\*anh.nguyenha@phenikaa-uni.edu.vn](mailto:anh.nguyenha@phenikaa-uni.edu.vn) (H.A.Nguyen)

[\\*\\*tuan.leanh@phenikaa-uni.edu.vn](mailto:tuan.leanh@phenikaa-uni.edu.vn) (A.T.Le)

<sup>1</sup> N.H. Anh and M.Q. Doan contributed equally to this work

**Calculation of limit of detection (LOD) and limit of quantification (LOQ)**

The standard curve of linear detecting range was given as:

$$Y = A + B \times \text{Log}(X) \quad (1)$$

where A and B are intercept and slope of regression equation obtained through the plot of the logarithmic SERS intensity (Y) – logarithmic concentration (X).

The LOD is calculated using the following equation [1]:

$$LOD = 10^{\left[ (Y_{blank} + 3SD) / Y_{blank} - A \right] / B} \quad (2)$$

The LOQ is calculated as

$$LOQ = 10^{\left[ (Y_{blank} + 10SD) / Y_{blank} - A \right] / B} \quad (3)$$

where  $Y_{blank}$  and SD are the SERS signal and the standard deviation of blank sample, respectively.

SD is calculated via the well-known formula:

$$SD = \sqrt{\frac{1}{n-1} \times \sum_i^n (x_i - x_{average})^2} \quad (4)$$

where  $x_i$  if the “i” sample of the series of measurements,  $x_{average}$  is the average value of SERS signal obtained from the blank sample repeated n times.

### Calculation of relative standard deviation (RSD)

The RSD value of repeatability and reproducibility is calculated via the well-known formula:

$$RSD = \frac{SD \times 100}{x_{average}} \quad (5)$$

where SD is the standard deviation that calculates using equation 4 and  $x_{\text{average}}$  is the average value of SERS signal obtained from each measurement.

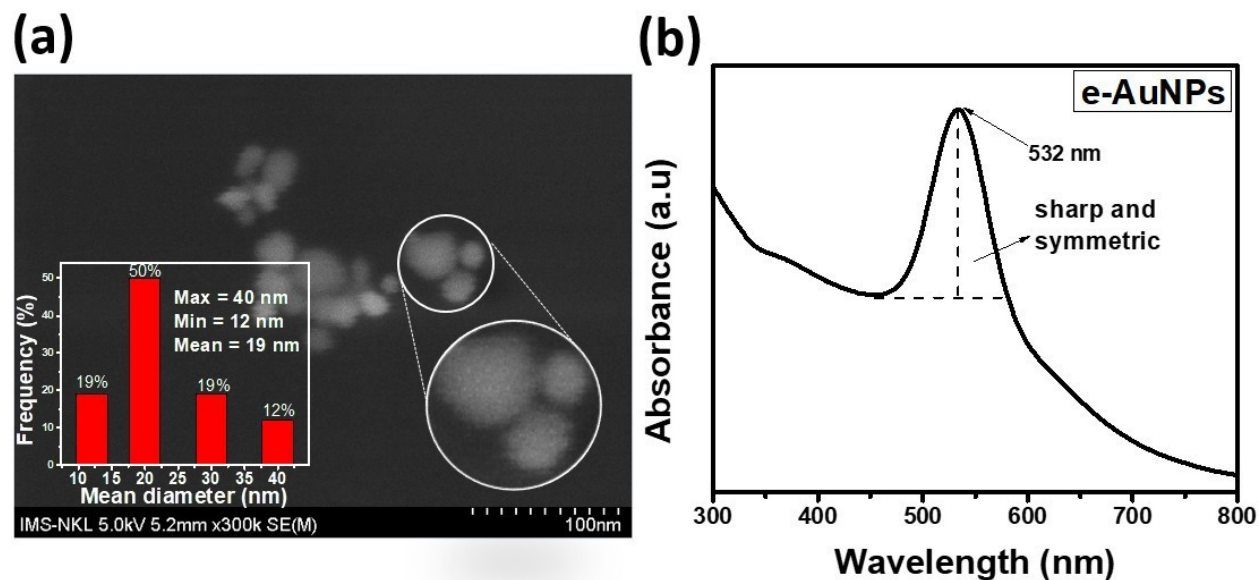

**Figure S1.** (a) SEM images and particle size distribution histograms of e-AuNPs (b) Absorbance spectra of e-AuNPs (Images adapted from ref [2])

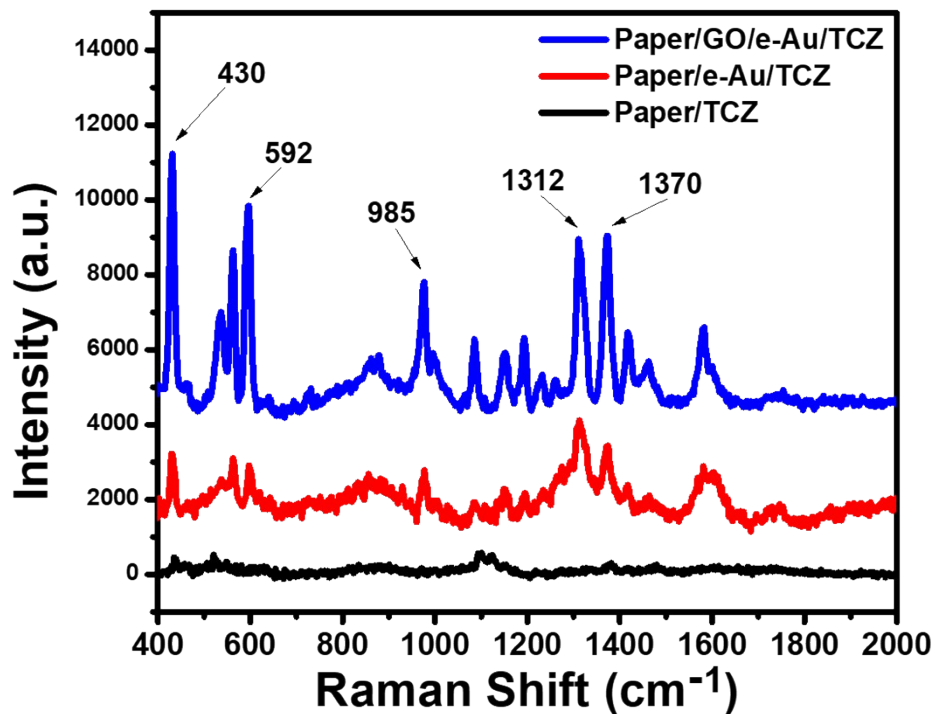

**Figure S2.** SERS spectra of TCZ on paper/GO/e-Au, paper/e-Au and paper.

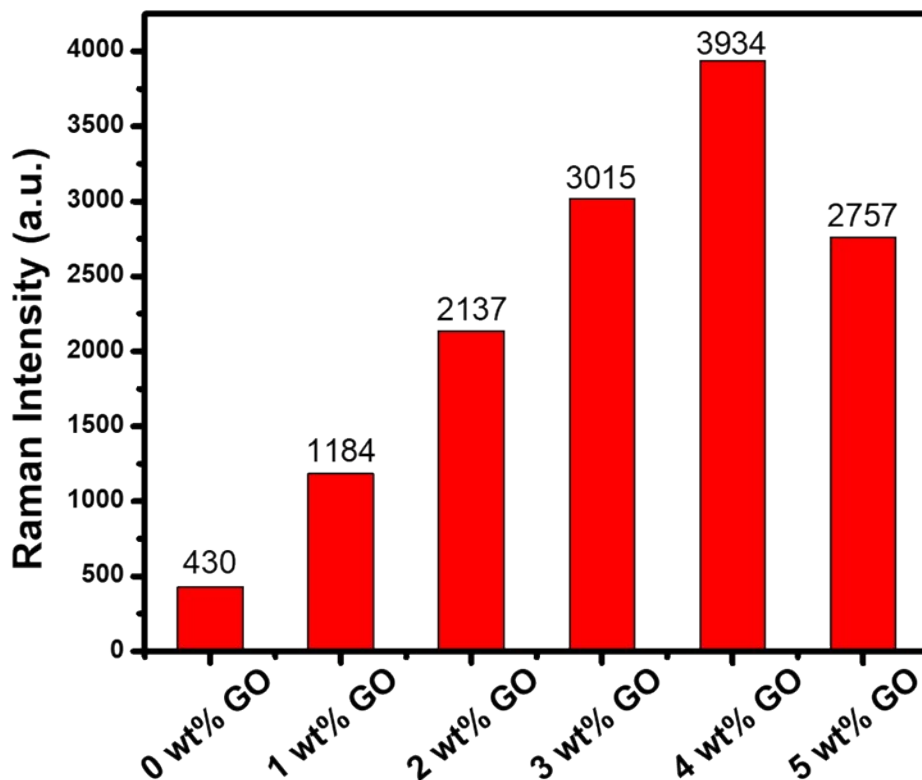

**Figure S3.** SERS intensity at the peak of  $592\text{ cm}^{-1}$  of TCZ ( $10^{-5}\text{ M}$ ) on Paper/GO/e-Au substrate with different GO contents.

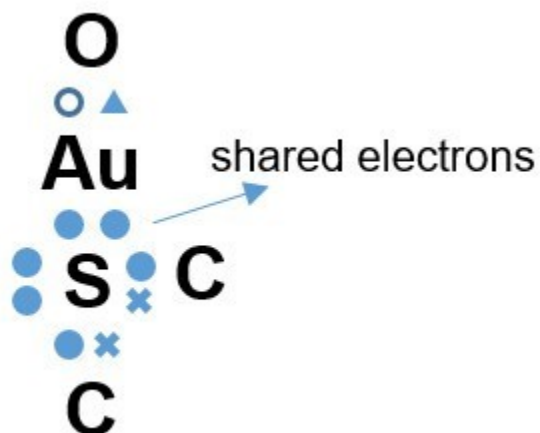

**Figure S4.** Lewis dot diagram of dative bond between Au atom in paper/GO/e-Au and S atom in TCZ.

**Table S1.** Characteristic peaks of ten organic molecules for feeding the machine learning model

| Compound        | Characteristic peak (cm <sup>-1</sup> ) | Assignment                                |
|-----------------|-----------------------------------------|-------------------------------------------|
| 4-nitrophenol   | 491                                     | C=O out-plane bending [3]                 |
|                 | 1248                                    | O–C stretching [3]                        |
|                 | 1322                                    | NO <sub>2</sub> symmetric stretching [3]  |
| Carbaryl        | 424                                     | C–C bending [4]                           |
|                 | 485                                     | C–C bending [4]                           |
|                 | 1230                                    | Ring vibration [4]                        |
|                 | 1443                                    | C–C wagging [4]                           |
| Chloramphenicol | 1163                                    | N–H in plane bending [5]                  |
|                 | 1347                                    | N–O <sub>2</sub> symmetric stretching [5] |
|                 | 1605                                    | Ring stretching [5]                       |
| Congo red       | 1159                                    | C–N stretching [6]                        |

|                |      |                                                        |
|----------------|------|--------------------------------------------------------|
|                | 1368 | (C=C) naphthyl stretching [6]                          |
|                | 1589 | C-C aromatic ring stretching [6]                       |
| Crystal violet | 424  | phenyl-C <sup>+</sup> -phenyl bending [7]              |
|                | 534  | skeletal ring vibrations and ring C-H deformations [7] |
|                | 915  | ring skeletal vibration of radical orientation [7]     |
|                | 1172 | C-H in-plane bending [7]                               |
| Glyphosate     | 455  | O-P=O bending [8]                                      |
|                | 774  | P-O bending [8]                                        |
|                | 860  | P-O stretching [8]                                     |
|                | 1035 | C-OH stretching [8]                                    |
| Methylene blue | 450  | C-N-C deformation [9]                                  |
|                | 505  | C-N-C deformation [9]                                  |
|                | 1390 | C-H in-plane ring deformation [9]                      |
|                | 1600 | C-C ring stretching [9]                                |
| Thiram         | 440  | CSS symmetric stretching [10]                          |

|              |      |                                      |
|--------------|------|--------------------------------------|
|              | 562  | S-S stretching [10]                  |
|              | 1143 | CH3 rocking [10]                     |
|              | 1365 | CH3 bending; C-C stretching [10]     |
| Tricyclazole | 430  | C-N-C deformation [11, 12]           |
|              | 985  | C-C symmetric stretching [11, 12]    |
|              | 592  | C-S-C deformation vibration [11, 12] |
|              | 1312 | C-N stretching [11, 12]              |
|              | 1372 | C-N stretching [11, 12]              |
| Urea         | 1000 | C-N stretching [13]                  |

## References

- [1] R. Chen, H. Shi, X. Meng, Y. Su, H. Wang, Y. He, Dual-Amplification Strategy-Based SERS Chip for Sensitive and Reproducible Detection of DNA Methyltransferase Activity in Human Serum, *Analytical Chemistry* 91(5) (2019) 3597-3603.
- [2] M.Q. Doan, N.H. Anh, N.X. Quang, N.X. Dinh, D.Q. Tri, T.Q. Huy, A.-T. Le, Ultrasensitive Detection of Methylene Blue Using an Electrochemically Synthesized SERS Sensor Based on Gold and Silver Nanoparticles: Roles of Composition and Purity on Sensing Performance and Reliability, *Journal of Electronic Materials* 51(1) (2022) 150-162.
- [3] T. Tanaka, A. Nakajima, A. Watanabe, T. Ohno, Y. Ozaki, Surface-enhanced Raman scattering of pyridine and p-nitrophenol studied by density functional theory calculations, *Vibrational Spectroscopy* 34(1) (2004) 157-167.
- [4] Y. Fan, K. Lai, B.A. Rasco, Y. Huang, Determination of carbaryl pesticide in Fuji apples using surface-enhanced Raman spectroscopy coupled with multivariate analysis, *LWT - Food Science and Technology* 60(1) (2015) 352-357.
- [5] K. Lai, Y. Zhang, R. Du, F. Zhai, B.A. Rasco, Y. Huang, Determination of chloramphenicol and crystal violet with surface enhanced Raman spectroscopy, *Sensing and Instrumentation for Food Quality and Safety* 5(1) (2011) 19-24.
- [6] M.L. de Souza, D.C. Tristão, P. Corio, Vibrational study of adsorption of Congo red onto TiO<sub>2</sub> and the LSPR effect on its photocatalytic degradation process, *RSC Advances* 4(44) (2014) 23351-23358.
- [7] S. Fateixa, H.I.S. Nogueira, T. Trindade, Surface-Enhanced Raman Scattering Spectral Imaging for the Attomolar Range Detection of Crystal Violet in Contaminated Water, *ACS Omega* 3(4) (2018) 4331-4341.
- [8] J.C.S. Costa, R.A. Ando, A.C. Sant'Ana, P. Corio, Surface-enhanced Raman spectroscopy studies of organophosphorous model molecules and pesticides, *Physical Chemistry Chemical Physics* 14(45) (2012) 15645-15651.
- [9] L. Zhong, Y. Hu, D. Xing, Adsorption orientation of methylene blue (MB<sup>+</sup>) on the silver colloid: SERS and DFT studies, 2009 Conference on Lasers & Electro Optics & The Pacific Rim Conference on Lasers and Electro-Optics, 2009, pp. 1-2.
- [10] J.S. Kang, S. Hwang, C.-J. Lee, M.-S.J.B.o.T.K.C.S. Lee, SERS of dithiocarbamate pesticides adsorbed on silver surface; *Thiram*, 23 (2002) 1604-1610.
- [11] H. Tang, D. Fang, Q. Li, P. Cao, J. Geng, T. Sui, X. Wang, J. Iqbal, Y. Du, Determination of Tricyclazole Content in Paddy Rice by Surface Enhanced Raman Spectroscopy, *Journal of Food Science* 77(5) (2012) T105-T109.
- [12] Q.-Q. Li, Y.-P. Du, Y. Xu, X. Wang, S.-Q. Ma, J.-P. Geng, P. Cao, T. Sui, Rapid and sensitive detection of pesticides by surface-enhanced Raman spectroscopy technique based on glycidyl methacrylate–ethylene dimethacrylate (GMA–EDMA) porous material, *Chinese Chemical Letters* 24(4) (2013) 332-334.
- [13] A. Culka, J. Jehlička, Raman microspectrometric investigation of urea in calcite and gypsum powder matrices, *Journal of Raman Spectroscopy* 41(12) (2010) 1743-1747.
